# Supplementary material
Source: publisher figshare collection journal article supplement (https://acs.figshare.com/ndownloader/files/17435819)
Supplement: Supplementary file 1 [file 17435819]

# Supporting Information

## Electron Transport in Muscle Protein Collagen

Jayeeta Kolay, Sudipta Bera and Rupa Mukhopadhyay\*

School of Biological Sciences, Indian Association for the Cultivation of Science, Jadavpur,  
Kolkata - 700 032, India

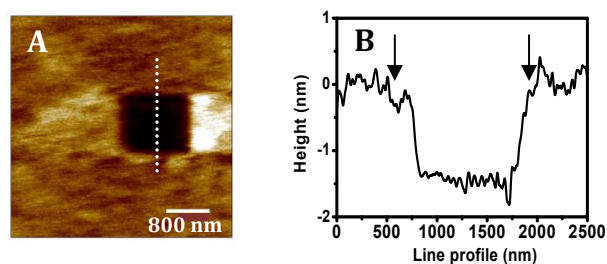

**Figure S1:** (A) ACAFM topography image of a scratched region of denatured collagen protein film formed onto silicon substrate; (B) cross-sectional line profile over the scratched region indicating layer thickness of 1.48 nm.

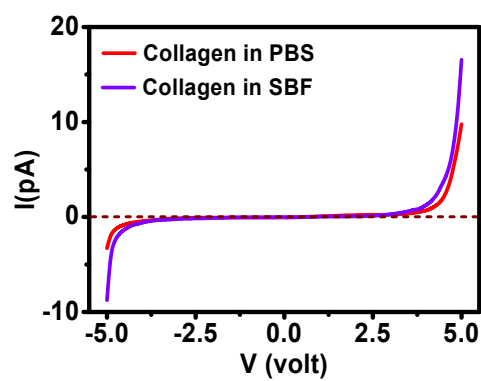

**Figure S2:** Overlay of averaged I-V curves of collagen in PBS and SBF under same force (54-60 nN) for  $\pm 5$  V sweep range, 10 sec sweep duration, up sweep direction, using CSAFS.

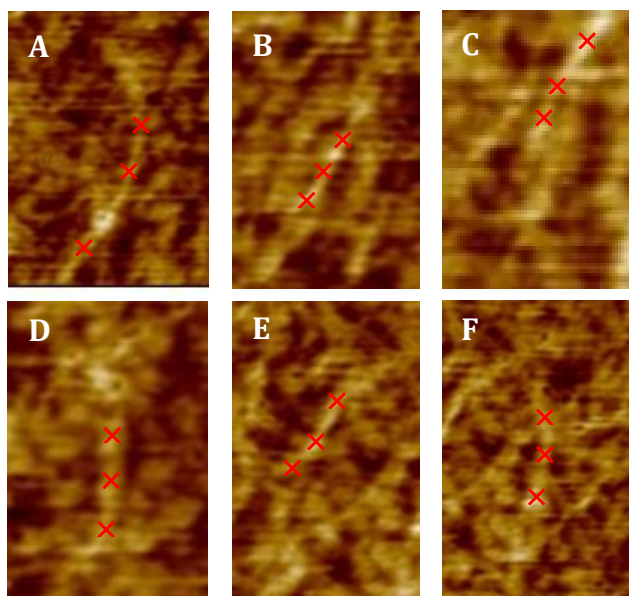

**Figure S3:** (A-F) Magnified views of the individual collagen fibers, along with the points of I-V data collection (red crosses) at different positions along the long axes of the fibers.

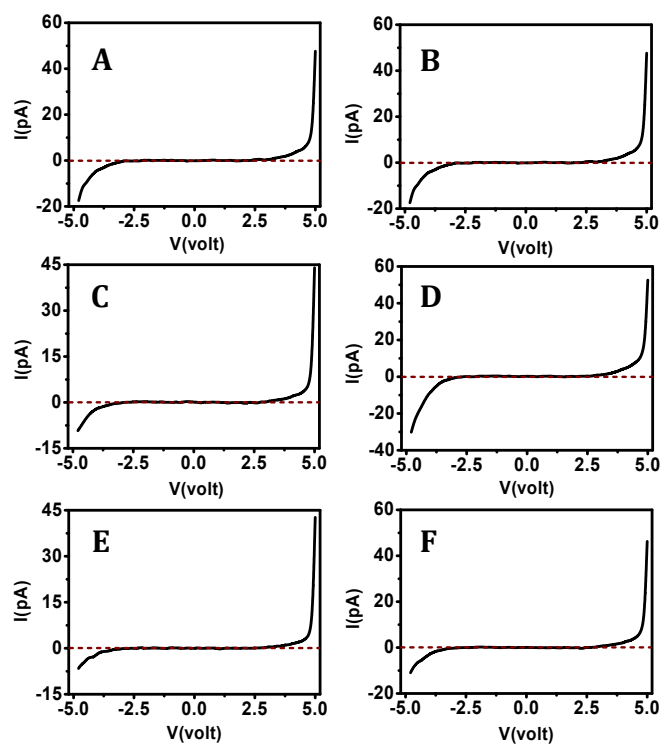

**Figure S4:** (A-F) Averaged I-V curves of six different collagen fibers at  $\pm 5$  V sweep range, 70 nN force load using CSAFS.

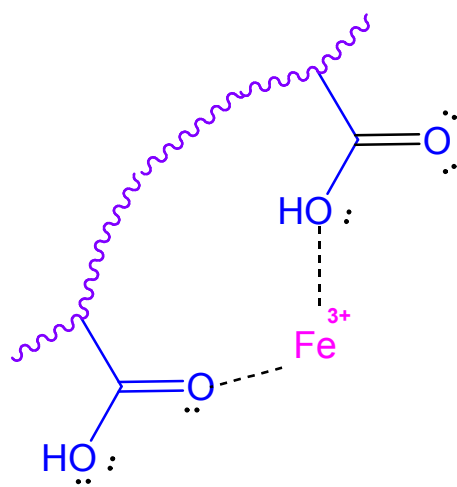

**Figure S5:** Chelating interaction of  $\text{Fe}^{3+}$  with carboxylic acid groups of acidic amino acid residues of collagen fibril.
